# Supplementary material for: Insight into the molecular requirements for pathogenicity of Fusarium oxysporum f. sp. lycopersici through large-scale insertional mutagenesis
Source: PubMed Central journal article supplement (PMC2687792; doi:10.1186/gb-2009-10-1-r4), 2009-01-09
Supplement: gb-2009-10-1-r4-S9.pdf [file gb-2009-10-1-r4-S9.pdf]

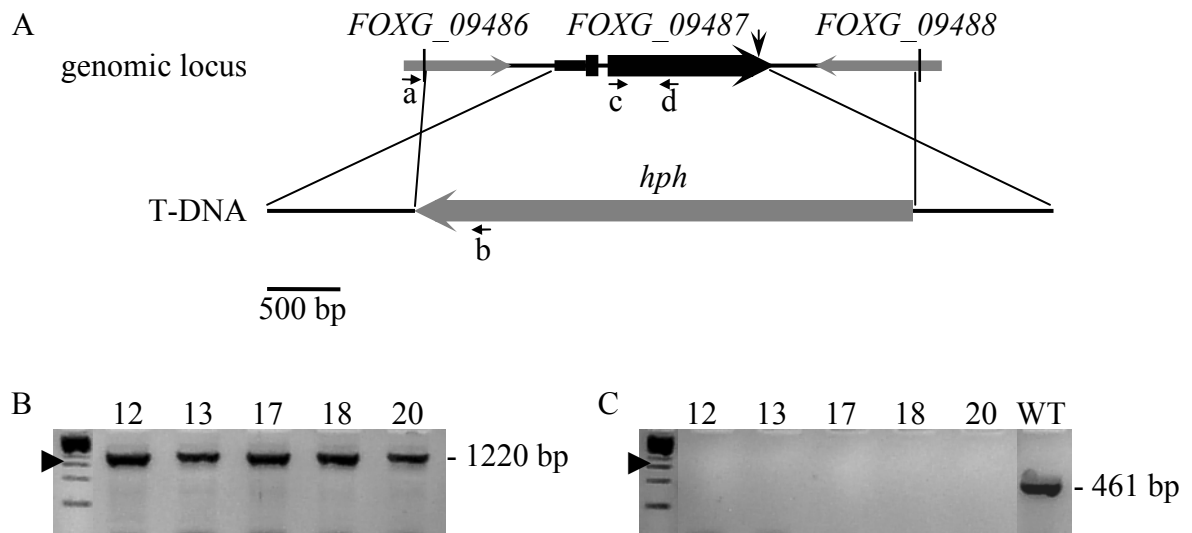

Supplementary figure S5. Analysis of transformants deleted for *FOXG\_09487*. A, Schematic representation of the knock-out strategy for *FOXG\_09487* drawn to scale. The arrow head indicates the position of the original T-DNA insertion. The small arrows represents the primers used for checking homologous recombination (a and b) and for checking the absence of the open reading frame (c and d). B, Verification of homologous recombination by PCR using primers a (FP1929) and b (FP1978). C, Verification of the absence of the open reading frame by PCR using primers c (FP1927) and d (FP1928). WT, wild type. ►, indicates the 750 bp fragment of the 1 kb DNA ladder (Fermentas). The numbers above the panels indicate the transformants used in the bioassay.
